# Supplementary material for: Electrochemical and structural characterization of lithiation in spray deposited ordered mesoporous titania as an anode for Li ion batteries
Source: Royal Society of Chemistry journal article supplement (doi:10.1039/d0ra02687e), 2020-01-01
Supplement: d0ra02687e1.pdf [file d0ra02687e1.pdf]

Supporting information

**Electrochemical and Structural Characterization of Lithiation in Spray Deposited Ordered Mesoporous Titania as Anode for Li Ion Batteries**

**Gunnar Símonarson<sup>1</sup>, Giulio Calcagno<sup>1</sup>, Antiope Lotsari<sup>1</sup> and Anders E.C. Palmqvist<sup>1</sup>.**

<sup>1</sup>Applied Chemistry, Department of Chemistry and Chemical Engineering, Chalmers University of Technology, 412 96 Göteborg, Sweden.

1. TEM Images
2. XRD Pattern
3. Electrochemical Impedance Spectroscopy
4. Nitrogen Sorption Analysis

## 1. TEM images

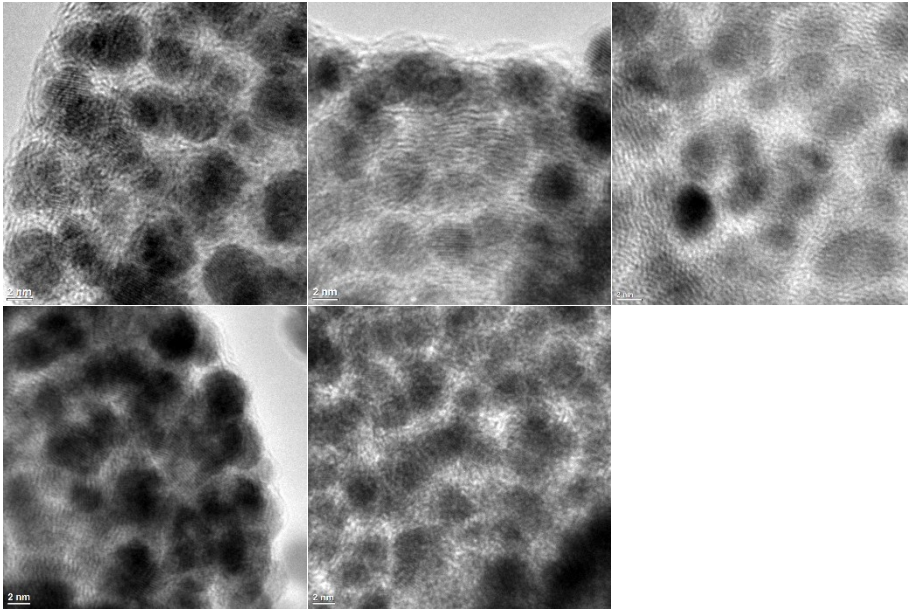

Figure S1. TEM images of the mesoporous titania electrode cycled to 1.0 V.

## 2. XRD Pattern

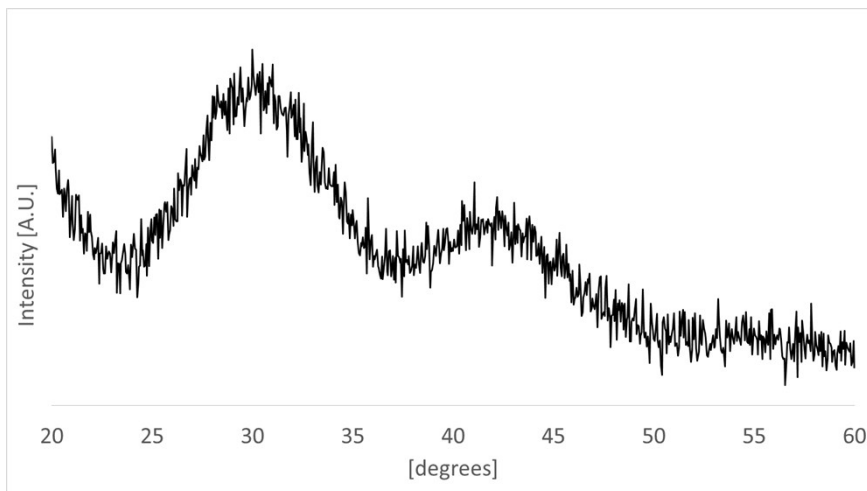

Figure S2. X-ray diffractogram of the spray deposited mesoporous titania.

### 3. Electrochemical Impedance Spectroscopy

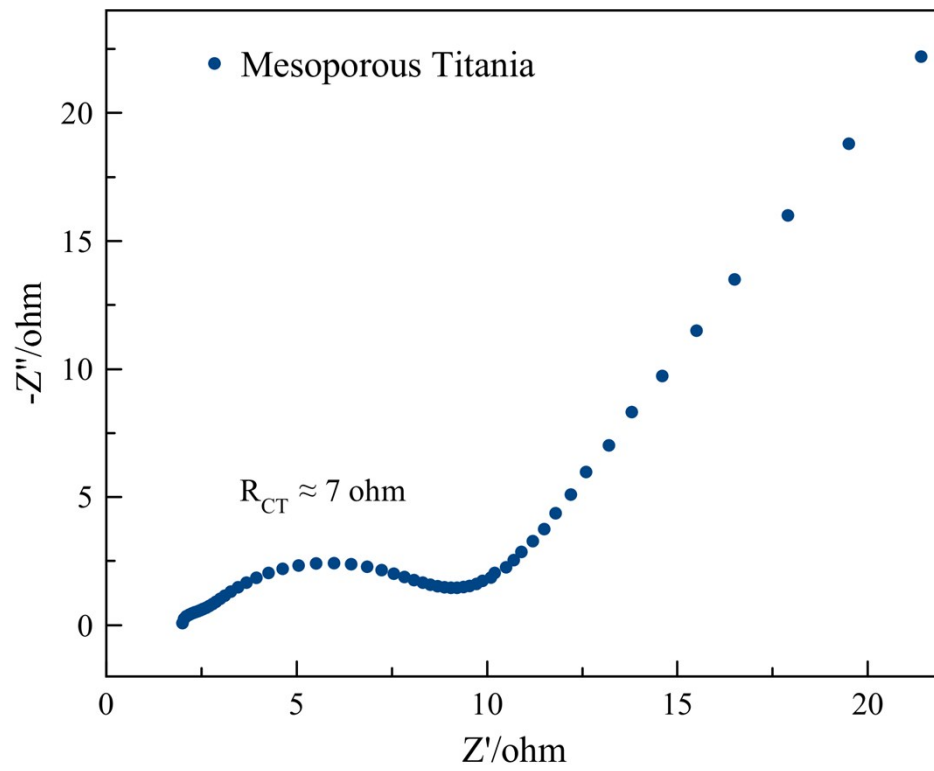

Figure S3. EIS spectrum of the titania electrode measured in the 3-electrode configuration with Li foil as reference electrode.

#### 4. Nitrogen sorption analysis

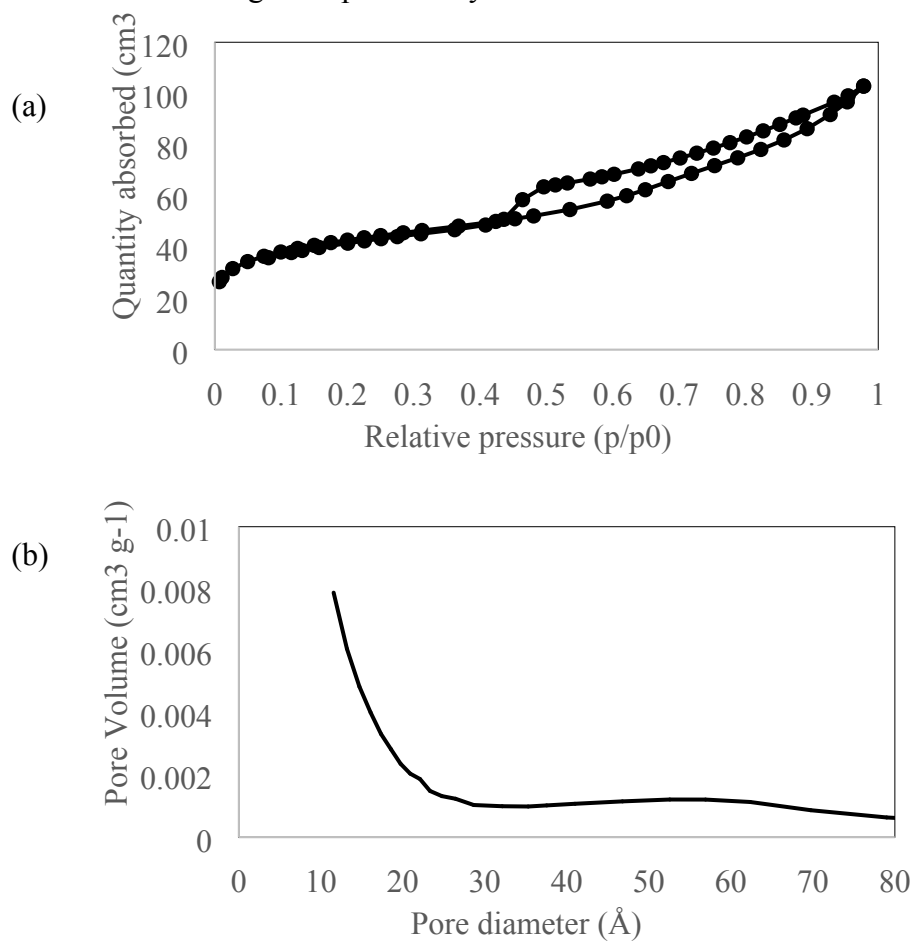

Figure S4. Nitrogen sorption measurements for mesoporous titania. (a) Nitrogen adsorption-desorption isotherms and (b) pore size distribution.
